1 **Title**

2 Integrative analyses to investigate the link between microbial activity and molecules  
3 degradation during anaerobic digestion

4

5 **Author names + Affiliations**

6 Laetitia Cardona<sup>1</sup>, Kim Anh Lê Cao<sup>2</sup>, Francesc Puig-Castellvi<sup>1,3</sup>, Chrystelle Bureau<sup>1</sup>, Céline

7 Madigou<sup>1</sup>, Laurent Mazéas<sup>1</sup>, Olivier Chapleur<sup>1\*</sup>

8 <sup>1</sup>Université Paris-Saclay, INRAE, PROSE,

9 1 rue Pierre-Gilles de Gennes, CS 10030, 92761 Antony Cedex, France

10 <sup>2</sup>Melbourne Integrative Genomics research unit, Melbourne University,

11 Building 184/30 Royal Parade, Parkville VIC 3052, Australia

12 <sup>3</sup>Ingénierie, Procédés, Aliments research unit, AgroParisTech, INRA, Université Paris-Saclay,

13 1 rue des Olympiades, 91300 Massy, France

14

15 **\*Corresponding author**

16 Tel + 33 1 40 96 65 06

17 Fax + 33 1 40 96 61 99

18 [olivier.chapleur@irstea.fr](mailto:olivier.chapleur@irstea.fr)

19 <https://orcid.org/0000-0001-9460-921X>

20

21 **Abstract**

22 Anaerobic digestion (AD) is a promising biological process to convert waste into sustainable  
23 energy. However, the microbiota involved in this bioprocess is complex and additional  
24 knowledge is still needed to fully exploit its capability. High throughput methodologies open  
25 new perspectives, but innovative data integration methodologies are required for extracting  
26 relevant information from these rich data. We analysed the association between microbial  
27 activity and the patterns of substrate degradation during a lab-scale co-digestion experiment.  
28 These parameters were longitudinally monitored using 16S rRNA sequencing and untargeted  
29 metabolomics. In this experiment, samples were collected from digesters fed with 9 different  
30 mixtures of fish, sewage sludge, and grass. Our objective was to identify microorganisms

31 responsible for the degradation of molecules specific of each co-substrate. Five main groups  
32 of correlated features were successfully evidenced. For example, the degradation of  
33 cadaverine was found to be correlated with microorganisms from the order *Clostridiales* and  
34 the genus *Methanosarcina*, and the degradation of lignin compounds was correlated with  
35 cellulolytic degraders *Lactobacillales*. This study highlights the potential of data integration  
36 towards a comprehensive understanding of AD microbiota.

37

### 38 **Keywords**

39 16S RNA sequencing; metabolomic; data integration; methanisation; co-digestion; PLS  
40 canonical

41

### 42 **Introduction**

43 Deciphering the microbial communities from diversified domains such as health, food  
44 safety and environment has been widely addressed by the development of the high-throughput  
45 technologies and adapted computational statistical methods. It is now possible to study the  
46 structure, activity, interaction and function of complex microbial communities using new  
47 methods from the genomics, transcriptomics, proteomics and metabolomics fields  
48 (Vanwonterghem et al., 2014). In parallel to the important advancements in these fields, the  
49 recent development of specific statistical methods and user-friendly workflows has  
50 substantially improved the visualisation, analysis and integration of the omics results (Bouhlef  
51 et al., 2018; Callahan et al., 2016; Rohart et al., 2017; Singh et al., 2019).

52 Anaerobic digestion (AD) is a promising bioprocess to provide sustainable energy.  
53 Indeed, driven by a complex microbial community, AD allows to transform organic waste  
54 into biogas. This process involves four different steps: hydrolysis, acidogenesis, acetogenesis  
55 and methanogenesis managed by the interaction of bacteria and archaea. Nonetheless, this

56 microbial diversity and its interaction are highly sensitive and depend on multiple parameters  
57 such as temperature (Madigou et al., 2019; Noll et al., 2010), presence of inhibitors such as  
58 phenol (Poirier et al., 2016), ammonia (Li et al., 2017), long chain fatty acids (Sousa et al.,  
59 2013), and feeding composition (Zamanzadeh et al., 2017). Several studies have already  
60 shown the utility of using omics technologies to decipher the anaerobic microbial population  
61 (Amha et al., 2018; Hassa et al., 2018). The level of information differs according to the type  
62 of used omics technology. Analyses of a single omics data type are routinely carried out (Bize  
63 et al., 2015; Cai et al., 2016); but the use of several omics at the same time is rare. For  
64 example Beale *et al.* applied metagenomic and metabolomic approaches to obtain new  
65 insights on the diversity and activity of the anaerobic population after stress (Beale et al.,  
66 2016). However, no direct correlation was assessed between the two approaches. More  
67 generally, in the literature omics data integration methodologies are still sparse.

68 The aim of this study was to evaluate a methodology to correlate the microbial activity  
69 to the metabolites specific of the substrates degradation. For that purpose, 3 different  
70 substrates (sewage sludge, grass, and fish) of different chemical composition were used. In  
71 this study, 27 anaerobic bioreactors fed with binary mixtures of the substrates (sludge and  
72 grass, or sludge and fish) at different proportions (0-100, 25-75, 50-50, 75-25, 100-0) were  
73 employed. By using these binary mixtures, it is possible to evaluate the evolution of the  
74 substrate-specific microorganisms and molecules. The active microbial community was  
75 analysed through the sequencing of the 16S rRNA. While DNA can inform us about the total  
76 diversity of a community (that includes dead, dormant and living microorganisms), RNA  
77 sequencing allow us to only characterise microorganisms active in a given environment (Lin  
78 et al., 2016) and to study therefore the metabolically active microorganisms (De Vrieze et al.,  
79 2018). Untargeted metabolomics using LC-MS was performed to study the pattern of the  
80 substrate degradation. Metabolomic experiments can be potentially used to determine the

81 molecular fingerprints of waste degradation and to monitor the patterns of substrate  
82 degradation (Villas-Bôas et al., 2006).

83 To our knowledge, this is the first study that studies the correlation between microbial  
84 activity from 16S rRNA sequencing data and pattern of substrate degradation from  
85 metabolomics data. Our computational analyses revealed subsets of active microorganisms  
86 highly associated to dynamics of substrate degradation over time, and posit novel hypotheses  
87 regarding the capacity of microorganisms to degrade specific molecules. For instance,  
88 cadaverine degradation was correlated to *Clostridiales* and *Methanosarcina*, which suggests a  
89 possible syntrophic relationship between these two microorganisms. Such association was  
90 already highlighted with a different anaerobic syntrophy between a *Clostridium*-like bacteria  
91 and *Methanospirillum* archaea (Roeder and Schink, 2009).

92

## 93 **Methods**

### 94 *Feedstock preparation*

95 The inoculum used in the digestion experiments was sampled from a mesophilic full  
96 scale industrial anaerobic bioreactor treating primary sludge from a wastewater treatment  
97 plant (Valenton, France). The inoculum was incubated in anaerobic condition at 35°C without  
98 feeding in order to degrade the organic matter in excess before to carry out the experiments.

99 Substrates used in the experiments were wastewater sludge collected from an industrial  
100 wastewater treatment plant (Valenton, France), fish waste obtained from a fish shop, and  
101 garden grass mowed from IRSTEA institute. Fish and grass wastes were crushed and kept at  
102 4°C until the incubation experiments.

### 103 *Bioreactors experimental set-up*

104 Binary mixtures of sludge with linearly increasing (0-100, 25-75, 50-50, 75-25, 100-0)  
105 percentages of either fish or grass were prepared (Figure 1). Experiments were carried out in

106 1L glass bottles (700 mL working volume) at 35°C in the dark without agitation. The same  
107 quantity of carbon was added in all the digesters, and the ratio of substrate/inoculum used to  
108 feed and inoculate all the digesters was fixed at 12 gCOD/1.2 gCOD (Table S1). All the  
109 bioreactors were complemented with a biochemical potential buffer (International Standard  
110 ISO 11734 (1995)) to reach a final working volume of 700 mL. All incubations were  
111 performed in triplicate. The bioreactors were then sealed with a screw cap and a rubber  
112 septum and the headspaces were then flushed with N<sub>2</sub> (purity >99.99%, Linde gas SA). In  
113 total 27 anaerobic bioreactors were set-up.

114 Weekly (at days 0, 7, 14, 21), for every reactor, 6 mL of liquid phase were sampled  
115 through the septum using a syringe. The collected samples were centrifuged at 10 000g for 10  
116 minutes to separate the supernatants from the pellets. Supernatant were snap frozen using  
117 liquid nitrogen and kept at -20°C for metabolomic analysis and pellets kept at -80°C for  
118 microbial analysis.

119

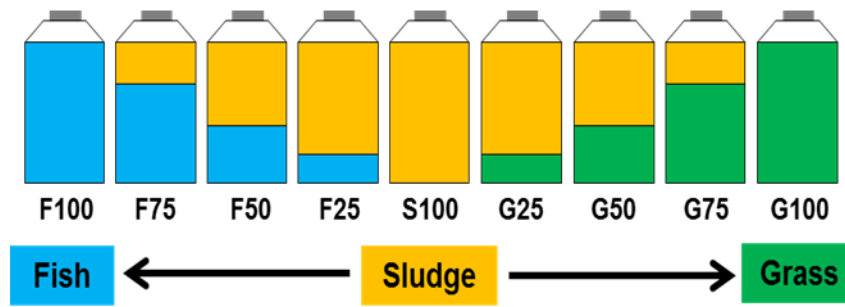

120

121 **Figure 1. Scheme of the batch experimental design.** S100 stands for wastewater sludge  
122 alone, F25, F50, F75, F100 stands for respectively 25, 50, 75 or 100% of fish (F) in co-  
123 digestion with sludge, G25, G50, G75, G100 stands for respectively 25, 50, 75 or 100% of  
124 Grass (G) in co-digestion with sludge

125

#### 126 *RNA extraction and 16S rRNA sequencing*

127 Based on the biogas production, a total of 22 samples were selected (active biogas  
128 production - Figure 2). Since fish-containing digesters showed a higher delay in the biogas  
129 production than grass-containing digesters, the used sampling time-points were different for  
130 the two substrates (day 14 for grass-containing digesters, and day 28 for fish-containing  
131 digesters). In addition, the microbial analysis was also performed for samples from the same  
132 digesters collected at day 21.

133

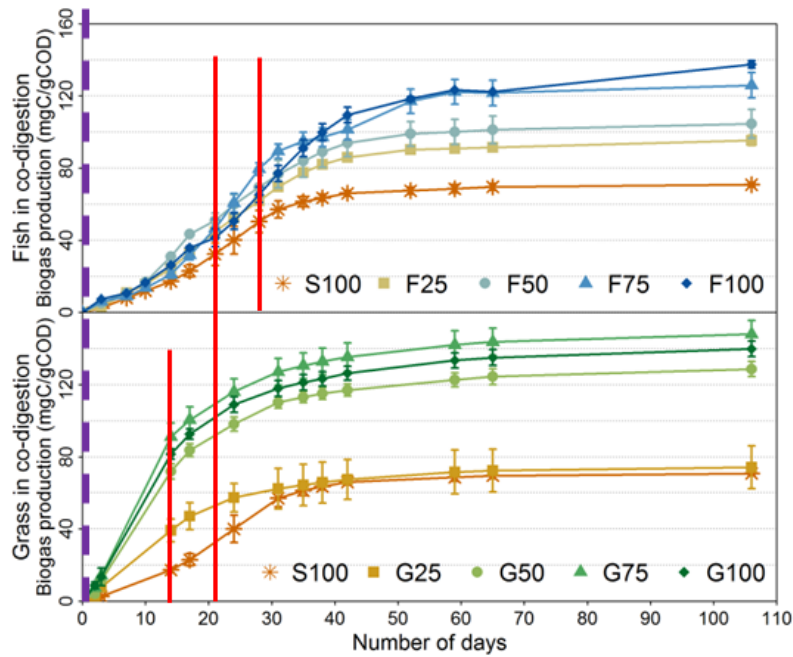

134

135 **Figure 2. Cumulated biogas production (mgC/gCOD) over time (Days) for the different**  
136 **bioreactors.** Mean values of the triplicate bioreactors, error bars represent standard deviations  
137 within triplicates. S100 stands for wastewater sludge alone; F25, F50, F75, F100 stands for  
138 respectively 25, 50, 75 or 100% of fish (F) in co-digestion with sludge; G25, G50, G75, G100  
139 stands for respectively 25, 50, 75 or 100% of Grass (G) in co-digestion with sludge. Red solid  
140 lines correspond to the 16S rRNA sequencing points and metabolomic points. Purple dashed  
141 line corresponds to the point where only metabolomic analysis was carried out.

142

143 The commercial kit FastRNA Pro™ Soil-Direct (MP Biomedicals) was used to extract  
144 the total RNA following the manufacturer's specifications. TURBO™ DNase (Ambion) kit  
145 following the manufacturer's instructions allowed to remove DNA co-extracted. The RNA  
146 was denatured by 2 min at 85°C in a dry bath and was then stored on ice. RNAClean XP  
147 magnetic beads purification system (Beckman Coulter) was used to RNA purification by  
148 adding 1.8 volumes of beads by volume of RNA. After mixing by pipetting and 5 min of  
149 incubation, beads were captured using a magnetic rack on one side of the tube and then  
150 washed by adding 500 µL of 70% cold ethanol (diluted in DEPC-water). Tubes were  
151 incubated during 30 seconds at room temperature and ethanol was removed then. This  
152 washing step was repeated 3 times. Once ethanol finally evaporated, beads were resuspended  
153 with DEPC-water to eluted RNA from the beads. Finally, beads were removed using the

154 magnetic rack and RNA was recovered in the supernatant. The integrity and quantity of the  
155 RNA was evaluated using High Sensitivity RNA ScreenTape and 4200 TapeStation (Agilent  
156 Technologies) following the manufacturer's protocol.

157 A reverse transcription polymerase chain reaction (RT-PCR) was carried out on the  
158 RNA using the mix iScript Reverse Transcription Supermix (Biorad) and the following  
159 thermocycler program: 5 min at 25°C, 30 min at 42°C and 5 min at 85°C. The cDNA was  
160 quantified using Qubit 2.0 fluorometer (ssDNA assay kit, Invitrogen, Life Technologies).

161 Archaeal and bacterial hyper variable region V4-V5 of the 16S rRNA gene were  
162 amplified as cDNA, and these amplicons were then sequenced according to the protocol  
163 described by Madigou *et al.* (Madigou et al., 2019).

164 FROGS (Find Rapidly OTU with Galaxy Solution), a galaxy/CLI workflow (Escudié et  
165 al., 2018), was used to design an OTU count matrix. R CRAN software (version 3.5.1) was  
166 used to examine the OTUs abundances. Alpha diversity was analysed using Shannon method  
167 using phyloseq R package (version 1.20.0). Considering the dispersion in the total number of  
168 reads identified in each sample, archaeal and bacterial OTUs abundances were scaled with  
169 total sum. Only OTUs that exceeded 1% in terms of relative abundance in at least one sample,  
170 were selected for the analysis and square-root transformed.

#### 171 *Metabolomic analysis*

172 Metabolomic analysis was performed on all collected supernatants. Samples were  
173 analysed using reverse phase liquid chromatography coupled to high resolution mass  
174 spectrometry (HPLC-ESI-HRMS) using a LTQ-Orbitrap XL instrument (Thermo Scientific).  
175 Samples were diluted at 1/10 in water and 10 µL of the solution was injected into the  
176 analytical system. Chromatographic separation was performed on Accela 1250 pump at 400  
177 µL/min with a linear gradient from 10 to 80% of mobile phase A (acetonitrile + 0.05% formic  
178 acid) and 90 to 20 % of mobile phase B (water + 0.05% formic acid) into a synchronis C18



179 column (50x2.1 mm, 1.7 $\mu$ m, Thermo Scientific) during 23 minutes, followed by a  
180 stabilization phase of 5 minutes to return at the initial condition. After chromatographic  
181 separation, the sample was ionized by electrospray ionization (ESI) on positive mode. The  
182 detection was performed in full scan over an  $m/z$  range from 50 to 500 at a resolution of 100  
183 000. A sample consisting on the supernatant from the digestion of anaerobic sludge was used  
184 as a quality control and injected every 10 experiment samples, blank samples were injected  
185 every 10 samples, and an equimolar mix of the samples was injected every 5 samples.

186 The raw data obtained from the LC-HRMS analyses were transformed into mzXML  
187 files using MSConvert (ProteoWizard 3.0). The XCMS R package (version 1.52.0) was used  
188 to process the data (Smith et al., 2006). The method *centWave* was used to determine  
189 chromatographic peaks (ROIs) with a  $m/z$  error of 10 ppm and a peakwidth between 20 and  
190 50 seconds. The ROIs found in different sample were grouped using the group method with a  
191 bandwidth of 30. ROIs retention times from the same ROI groups were unified across samples  
192 using the *orbiwarp* method. A second grouping was carried out using a bandwidth of 25.  
193 Finally, missing ROIs in the samples were filled using the *fillPeaks* method. Initial metabolite  
194 identification was performed based on the comparison of the accurate molecular mass  
195 measured by LC-HRMS with the corresponding values found in the online databases HMDB,  
196 LipidMaps, and PubChem (Fahy et al., 2007; Lee et al., 2018; Wishart et al., 2018). In  
197 addition, for selected compounds, a confirmation of the metabolite identification was  
198 performed by MS/MS fragmentation, and followed by the comparison of the acquired MS/MS  
199 spectra with the theoretical spectra from the online databases HMDB and MassBank (Horai et  
200 al., 2010).

201

202 *Statistical analysis*

203 Statistical methods from mixOmics R package (Rohart et al., 2017) were used to  
204 highlight the relationship between the key microorganisms and the molecules degradation  
205 pattern.

206 Firstly, in order to highlight the most active microorganisms involved in the substrate  
207 degradation independently of the mixture composition, the method sparse Principal  
208 Component Analysis (sPCA, (Shen and Huang, 2008)) was used on the microbial dataset.  
209 This method allows to select the OTUs that highly contributed to explain the main source of  
210 variance in the data.

211 To study the dynamics of the metabolites between the different feeding types, we used  
212 sparse Partial Least Squares Discriminant Analysis (sPLS-DA, (Lê Cao et al., 2011)) on the  
213 mono-digestion samples (S100, F100, G100) at day 0 to select the most discriminative  
214 molecules. This analysis enabled to identify the molecules specific of each substrate at the  
215 beginning of the experiment. These most discriminant molecules were selected based on the  
216 error rate of classification obtained for each component when adding progressively the  
217 number of molecules.

218 The patterns of abundance of the selected OTUs and molecules within the mixtures and  
219 over time were observed with heatmaps (heatmap.2 function from gplots R package, version  
220 3.0.1) using the Ward method and Manhattan Euclidean distance for respectively OTUs and  
221 molecules abundances.

222 Secondly, to study the correlation between microbial activities and molecules  
223 degradation over time, the selected molecules data were transformed using a ratio between the  
224 molecules abundances at Day 0 and days 14, 21 or 28. The two sets of data (selected  
225 microorganisms and molecules in the first part) were statistically integrated using a PLS  
226 canonical mode (Lê Cao et al., 2009) and their variabilities through the different mixtures

227 were studied. Microorganisms and molecules with a similar pattern of evolution were grouped  
228 together using a hierarchical clustering using complete linkage method to identify the  
229 microorganisms involved in the degradation of the molecules.

230

## 231 **Results and discussion**

232 A comparison of the major chemical parameters of anaerobic digestion is described in  
233 a precedent study (Cardona et al., 2019). This study describes the influence of adding a  
234 second substrate to improve the digestion performances. Because the present study focuses on  
235 the correlation of microbial activity and molecule degradation, the performance results will  
236 not be described in details here.

### 237 *Influence of the feeding composition on the microbial community*

238 The alpha diversity using Shannon index (supplemental Figure S1) was calculated on  
239 archaeal and bacterial communities in order to evaluate the influence of the feeding  
240 composition on the microbial diversity. We observed that the archaeal and the bacterial  
241 diversity is inversely proportional to the amount of fish added in the digester. The low  
242 microbial diversity induced by the presence of fish substrate might be explained by a simpler  
243 substrate composition (in terms of molecular variety) in this substrate, or by a higher  
244 functional redundancy of the microorganisms that can degrade fish substrate if compared to  
245 those that can degrade grass or sewage sludge.

246 The sPCA sample plot highlighted the influence of the feeding composition on the  
247 microorganisms abundance (Figure 3). We identified 43 OTUs representing 65 to 85% of the  
248 total microbial community that explained most of the variability in the 16S rRNA data.  
249 Samples were grouped in three clusters, according to the major co-substrate, and regardless of  
250 their sample collection time. This result reveals low time variability within the conditions and  
251 a stable microbial community over time.

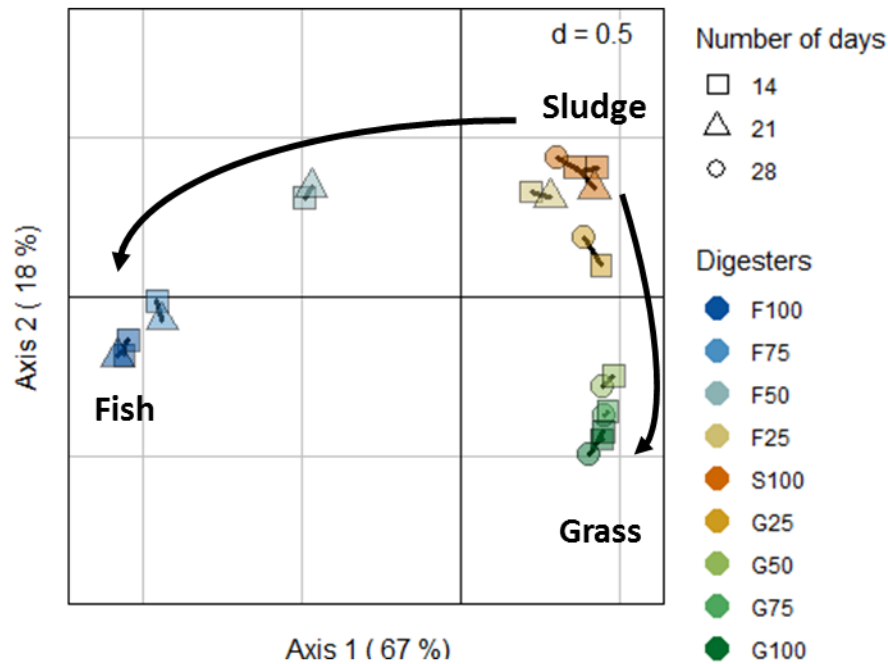

252

253 **Figure 3. Microbial dynamics over time with respect to the different feeding**  
254 **compositions.** Sample plot from the sPCA from the 16S rRNA dataset. Digesters are  
255 represented by colours and number of days by symbols.  
256

257 The individual abundances of the selected microorganisms were compared between the  
258 different mixtures (Figure 4). The active archaeal community was different according to the  
259 feeding type. Fish mono-digestion (F100) was mostly driven by the archaea *Methanosarcina*  
260 OTU\_6 and *Methanoculleus* OTU\_18; grass mono-digestion (G100) by *Methanospirillum*  
261 OTU\_24, *Methanosarcina* OTU\_1, *Methanofollis* OTU\_64 and sludge mono-digestion  
262 (S100) by *Methanosarcina* OTU\_1, *Methanobacterium* OTU\_63 and 204 and two OTUs of  
263 *Methanoculleus* (18 and 50). Except *Methanosarcina* which has a versatile methanogenesis  
264 metabolism, all the identified archaea use only the hydrogenotrophic pathway to produce  
265 methane. Regarding *Methanosarcina*, it may be noteworthy to highlight that fish substrate  
266 specifically induced the activity of *Methanosarcina* OTU\_6, since it was not found in the  
267 other substrates.

268

269           The diversity in bacteria community also differed between feeding types. As observed  
270 in the alpha diversity analysis, the fish substrate induced a lower microbial diversity than  
271 grass or sludge. In fish mono-digestion, the order *Clostridiales* represented more than 90% of  
272 the community. In grass mono-digestion, the abundance of *Spirochaetales*, *Fibrobacterales*,  
273 *Lactobacillales* and *Enterobacteriales* was higher than in fish and sludge mono-digestion,  
274 favoured by their ability to degrade cellulolytic substrates such as grass. Bacterial community  
275 of sludge mono-digestion was mostly composed by *Cloacimonadales*, *Synergistales*,  
276 *Anaerolineales*, *Hydrogenedentiales*, *Erysipelotrichales* and *Coprothermobacteriales*.  
277 Members from the orders *Synergistales* and *Anaerolineales* are known or suspected to be able  
278 to form syntrophic interaction with hydrogenotrophic methanogens (Ito et al., 2011; Sekiguchi  
279 et al., 2001). In sludge, the abundance of potential syntrophic partners in presence with  
280 hydrogenotrophic methanogens suggests that methane production was mainly produced from  
281 the hydrogenotrophic methanogenesis pathway, in line with the archaeal community  
282 described in this incubation.

283           In light of the literature, the type of substrate used to feed the digesters leads to the  
284 development of an adapted microbial community of degraders (De Francisci et al., 2015; Lee  
285 et al., 2018). Specifically, in addition to a lower microbial diversity, fish substrate induced the  
286 growth of a more specific community than that observed in grass and in sludge substrates.  
287 Indeed, only 5% of the OTUs were found in both samples collected from fish- and sludge-  
288 digesters, and 9% were found in both samples collected from fish- and grass-digesters, while  
289 17% of the OTUs were common between samples collected from grass- and sludge-digesters.

290

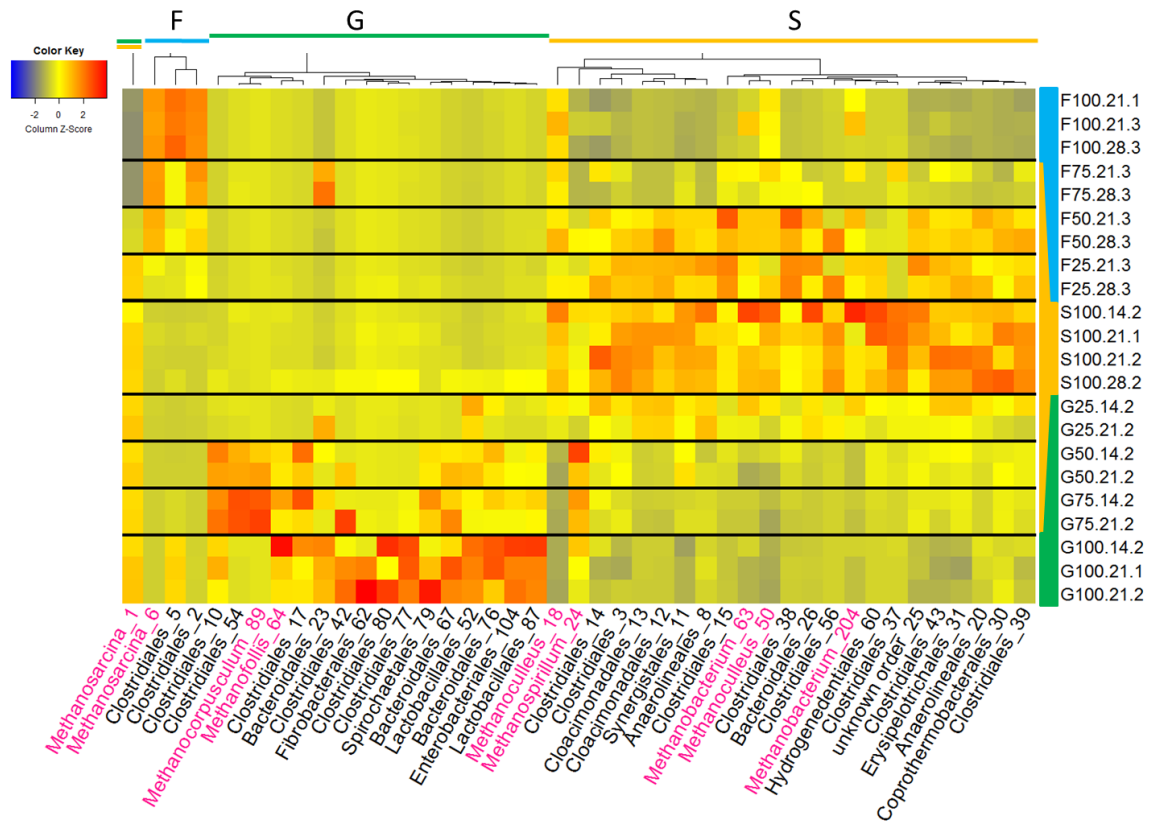

291

292 **Figure 4. Heatmap of the most discriminant active microbial community composition.**

293 The heatmap shows the abundances of the most discriminant microorganisms selected by the  
 294 sPCA. The substrate used, day, and replicate number are indicated in the row labels..  
 295 Duplicates were carried out on the bioreactors containing only fish, grass or sludge at day 21.  
 296 Taxonomy is indicated at the genus level for archaea (pink) and order level for bacteria  
 297 (black) completed by the OTU number. Heatmap color goes from blue to red in accordance to  
 298 the abundance increase.

299

300 Within the mixtures, the proportion of the selected microorganisms evolved according  
 301 to the feeding composition. However, the evolution of the microbial response was not  
 302 completely linear. For example, the relative abundances of the active OTUs in the fish:sludge  
 303 mixture at 75:25 (F75) was close to the relative abundances of the active microorganisms in  
 304 the fish mono-digestion. On the other hand, the more sludge was added in the feeding, more  
 305 active microorganisms characteristic of sludge were recovered. On the contrary, the active  
 306 microbial community in grass remained dominant even down to 25% of grass (in the mixture  
 307 with 75% of sludge, G25). Despite the progressive evolution for most of the microorganisms  
 308 was observed across all the samples, some microorganisms were only found in specific

309 conditions such as *Methanocorpusculum* and specific OTUs of *Clostridiales* in the mixes  
310 50:50 and 75:25 of grass:sludge.

311 Biogas can be regarded as the final outcome of the active microbial composition, and  
312 therefore, an association between microorganisms' dynamics and the biogas production  
313 performances can be drawn (Figure 2). For example, the similarity of the microbial  
314 composition between F100 and F75, or between G25 and S100, induced a similar biogas  
315 production. Thus, the bioreactors performances depend on the ability of the microbial  
316 community to adapt to the added substrates.

317

### 318 *Substrates degradation dynamics*

319 The temporal dynamics of the degradation of the different substrate mixtures in the  
320 bioreactors were studied. For that purpose, the metabolic fingerprint of the degradation in the  
321 digesters were analysed using an HPLC-ESI-HRMS instrument. After data examination with  
322 XCMS, a total of 267 ROIs were detected. To identify the molecules (ROIs) specific to each  
323 substrate, and that were initially present, sPLS-DA was performed on the metabolomics data  
324 from samples relative to the mono-digestion bioreactors (F100, G100 and S100) at day 0.  
325 From this analysis, a total of 70 molecules were determined to be specific of any of the 3  
326 substrates.

327 The degradation pattern of the selected molecules within the mixtures and over time  
328 was evaluated by comparing their intensities (Figure 5). The molecules were grouped  
329 according to their initial intensities at day 0. Four major groups can be distinguished from this  
330 clustering. 3 of these groups include the ROIs whose relative intensities were significant only  
331 in sludge-, grass- or fish-enriched digesters, respectively (S, G, and F, respectively, in Figure  
332 5). The other group (FG in Figure 5) include the ROIs whose relative intensities were high in  
333 both fish- and grass- but low in sludge-containing digesters.

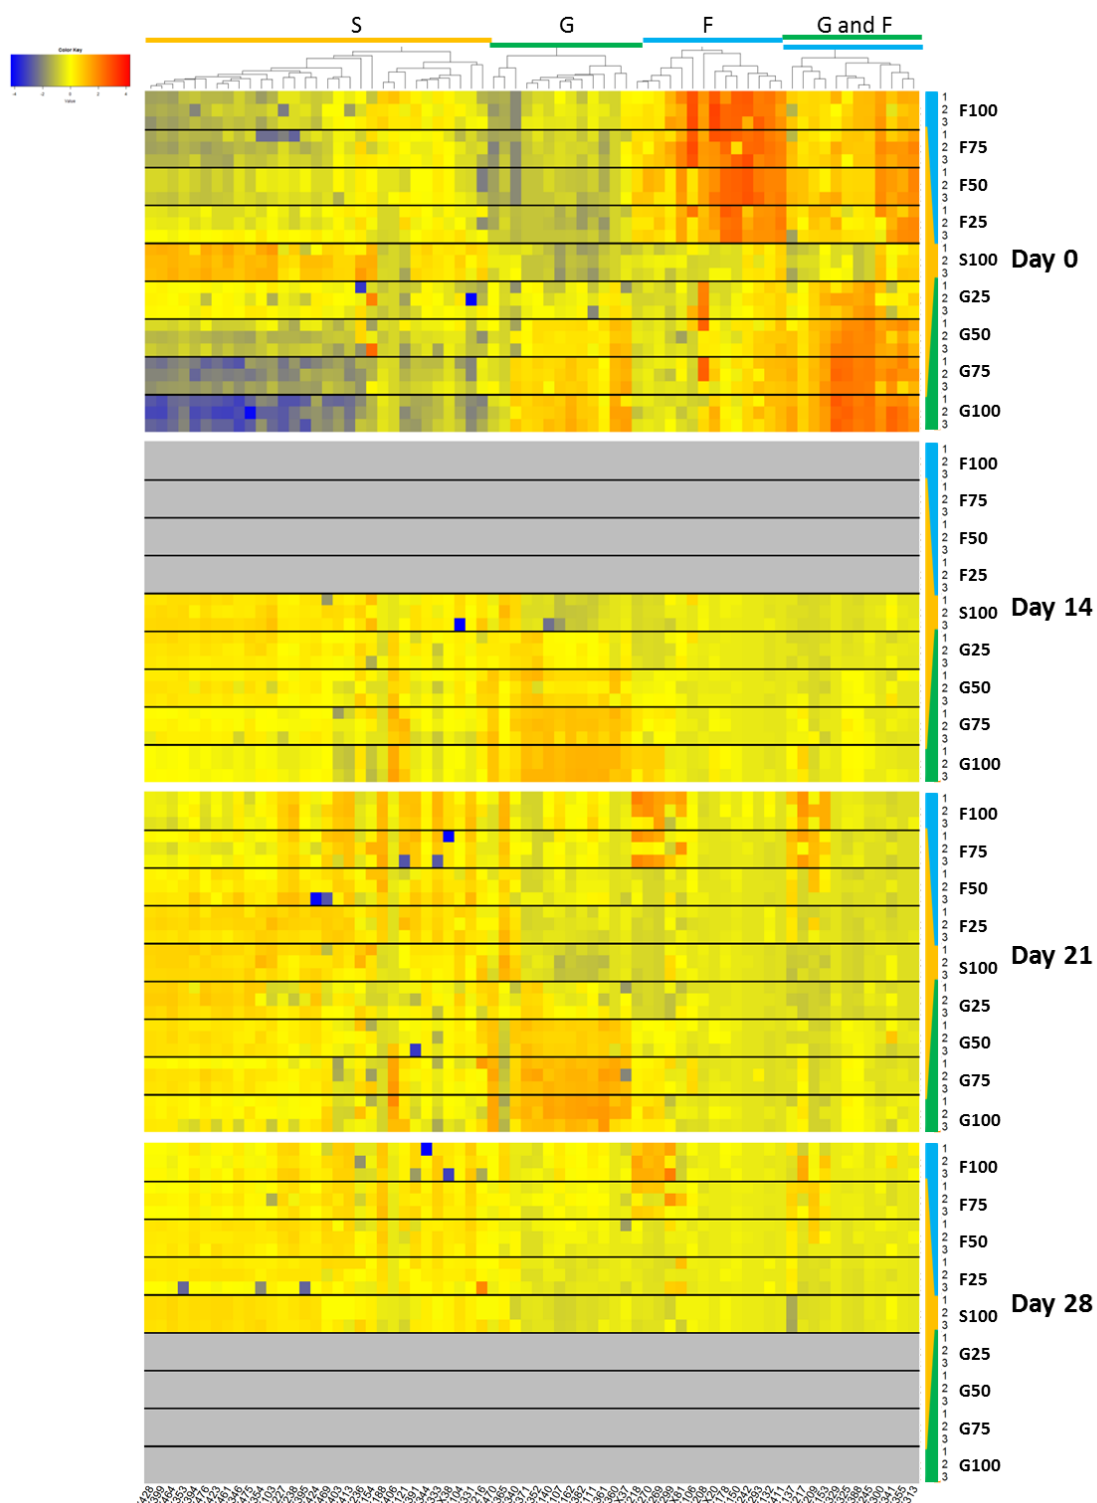

334

335 **Figure 5. Molecules dynamics within bioreactors and over time.** The heatmap shows the  
336 evolution among the samples and over time of the intensity of the most discriminant ROIs  
337 selected by the sPLS-DA in the different feeding type fish, grass and sludge at day 0.  
338 Analyses were carried out at days 21-28 for bioreactors containing fish, 14-21 for bioreactors  
339 containing grass and 14-21-28 for bioreactors containing sludge. For each waste mixture and  
340 date, triplicates bioreactors called 1, 2 and 3 were analysed. Heatmap color goes from blue to  
341 red in accordance with the abundance increase.



342 At day 0, the intensity of the ROIs representative of each feeding type differed within  
343 the samples. This result was expected due to the differences in the substrate molecular  
344 composition. Moreover, the intensity of the ROIs representative of sludge decreased when  
345 fish or grass was mixed with sludge. On the other hand, the intensities of some ROIs  
346 representative of fish or grass were similar within all the digesters containing fish or grass.

347 As expected, the intensity of some ROIs decreased over time, while some other either  
348 increased or remained stable during the experiment. These molecules with stable intensity  
349 across time may not be easily degraded, or they may be a product of degradation of other  
350 molecules.

351 The putative identification of the ROIs based on the comparison of their theoretical  
352 formula and molecular weight to databases is given in the Table S2. Examples of metabolite  
353 biomarkers of sludge are diethylthiophosphate (X340) and 6-methylquinoline (X218 and  
354 X270). Diethylthiophosphate is a common degradation product of organophosphorus  
355 pesticides, while 6-methylquinoline is a flavouring ingredient found in tea.

356 In grass-fed bioreactors, grass biomarkers were classified as plant constituents (betaine,  
357 X245), metabolites obtained in lignin degradation (trans-ferulic acid and p-coumaric acid,  
358 X388 and X365, respectively), and metabolites from sugar metabolism (galactitol, X329).

359 In fish bioreactors, most of the metabolites corresponded to organic compounds  
360 resulting from amino acids degradation (cadaverine and histamine, X132 and X150,  
361 respectively). Therefore, in all cases, the substrate-specific metabolites were biologically  
362 consistent with the corresponding substrates, as these metabolites were constituents of the  
363 substrates or degradation products from these constituents.

364

365 *Correlation between microbial activity and substrates degradation pattern*

366 A PLS analysis was performed to integrate the data relative to the microorganism  
367 activity with the data of the molecules degradation. The rate of molecules degradation in the  
368 bioreactors was estimated by dividing the molecules relative intensity at day 0 by their  
369 intensity at days of interest.

370 The ordination plots from PLS (Figure S2 A to C) show similar patterns for the two  
371 datasets, suggesting that an underlying correlation structure between the two datasets exist.  
372 The correlation circle plot (Figure S2-D) allows visualizing at the same time the groups of  
373 active microorganisms correlated to the molecules degradation rate. To further identify the  
374 microorganisms potentially responsible of the molecules degradation, a hierarchical clustering  
375 based on the loadings of the microbial and metabolic from the PLS was performed. Five  
376 groups of correlated microorganisms and molecules were identified according to their  
377 substrate specificity (Tables S2 and S3). Figure 6 depicts the mean values of the microbial  
378 activity and molecule degradation rate according to the feeding types. Group 1 included  
379 microorganisms and molecules with a high microbial activity and high molecule degradation  
380 rate during the digestion of sludge and grass. Groups 2-4 included microorganisms and  
381 molecules that are specific of either sludge, grass, or fish, respectively. Finally, group 5  
382 included the microorganisms and molecules that were highly active and highly degraded,  
383 respectively, in fish and sludge bioreactors.

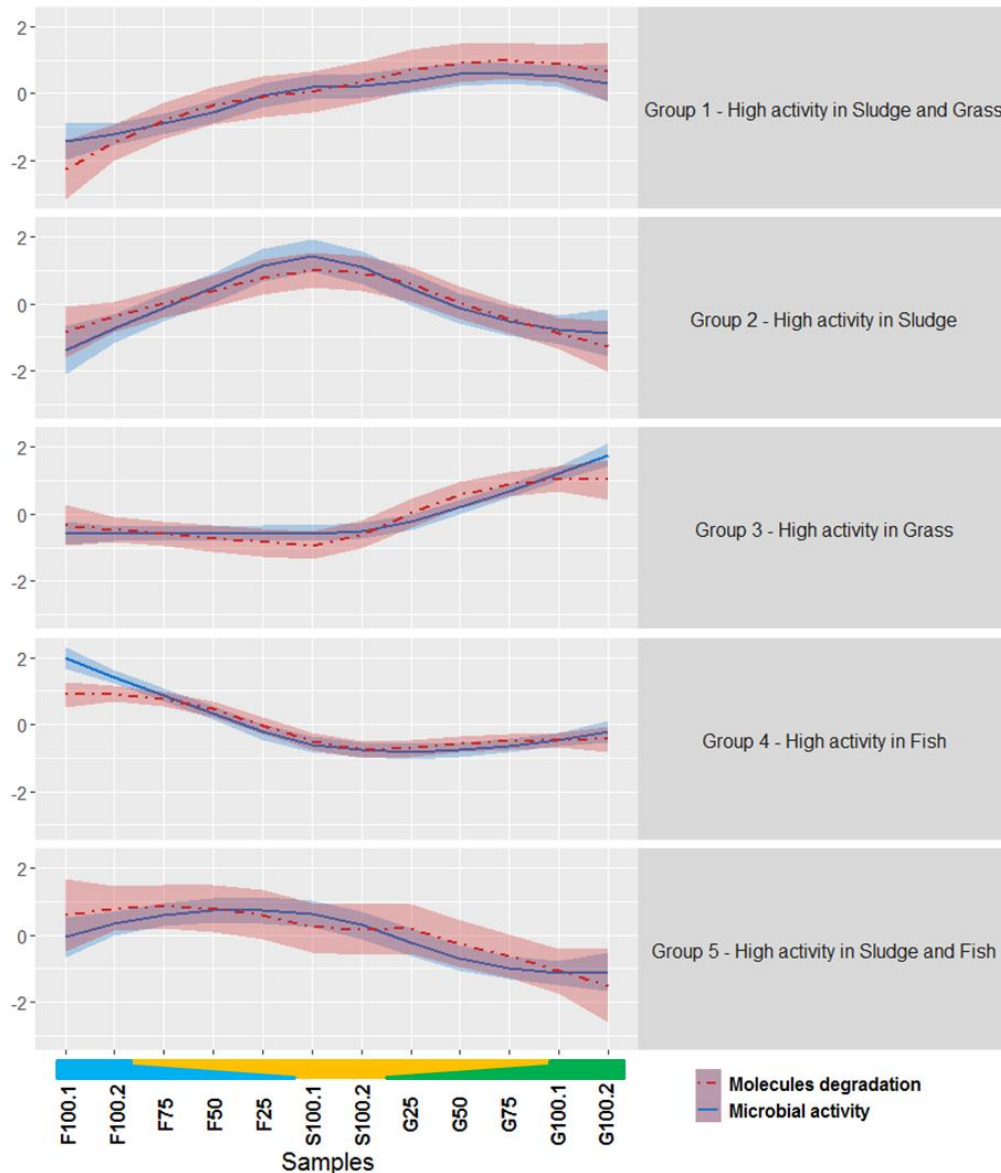

384

385 **Figure 6.** Dynamics of the active microorganisms correlated to the molecules  
386 degradation among the samples at day 21. Duplicates were carried out on the bioreactors  
387 containing only fish, grass or sludge. Line represents the mean values of the different  
388 microbial activity (solid blue line) or molecules degradation rates (dashed red line) included  
389 in every clusters, the shadowing traces represent their standard deviation. Duplicates were  
390 carried out on the bioreactors containing only fish, grass, or sludge. S100 stands for  
391 wastewater sludge alone, F25, F50, F75, F100 stands for respectively 25, 50, 75 or 100% of  
392 fish (F) in co-digestion with sludge, G25, G50, G75, G100 stands for respectively 25, 50, 75  
393 or 100% of Grass (G) in co-digestion with sludge.

394

395 Group 1 included two genera of archaea, *Methanosarcina* and *Methanospirillum*, and  
396 the molecules diethylthiophosphate and N-(3-methylbutyl)acetamide (X153). As stated  
397 before, diethylthiophosphate is pesticide degradation product and a urine metabolite (Nomura

398 et al., 2014). Conversely, N-(3-methylbutyl)acetamide is a metabolite found in alcoholic  
399 beverages obtained by the fermentation of vegetal such as beer and wine. One hypothesis  
400 explaining the correlation of these archaea and molecules could be due to an indirect role of  
401 the archaea in the molecules degradation through a syntrophic interaction with bacteria.  
402 However, no further explanation can be done at this stage regarding their correlation, since  
403 such association had not been reported before and therefore further investigations are  
404 required.

405 Group 2 correlated 14 OTUs from the orders *Cloacimonadales*, *Clostridiales*,  
406 *Anaerolineales*, *Synergistales*, *Bacteroidales*, *Hydrogenedentiales* and  
407 *Coprothermobacteriales* to 8 molecules including compounds from tryptophan degradation (L-  
408 tryptophanol and tryptamine, X217 and X269, respectively), 6-methylquinoline and  
409 thioacetic acid, among others. In agreement with these metabolites, *Anaerolineales* and  
410 *Synergistales* are known for their ability to degrade amino acids (Swiatczak et al., 2017).  
411 Thus, their correlation with L-tryptophanol and tryptamine is consistent with the literature.  
412 Surprisingly, no methanogen was clustered in this group despite they were expected to be  
413 highly correlated with these syntrophic bacteria. One reason could be that the methanogens  
414 were not specific partners of these bacteria. Indeed, most of the methanogens were found  
415 ubiquitously in bioreactors fed partly with either sludge or grass as shown in the figure 4.

416 In group 3, 12 OTUs mostly from the orders *Clostridiales*, *Lactobacillales*,  
417 *Bacteroidales* and *Spirochaetales* and the archaea *Methanofollis* were correlated to 7  
418 molecules including sugar and lignin compounds, plant constituents, and protein degradation  
419 products. From this group, it is worth to highlight the correlation between the microbial  
420 activity of the lactic acid bacteria *Lactobacillales* and the degradation of lignin compounds  
421 such as trans-ferulic acid (X388) and p-coumaric acid (X365). Indeed, such microorganisms  
422 are lignin degraders (Fessard and Remize, 2017; Filannino et al., 2014).

423 In group 4, *Methanosarcina* and 2 OTUs from the order *Clostridiales* were correlated to  
424 molecules that can be classified as amino acids degradation products. Cadaverine (X132) and  
425 5-aminopentanoic acid (X208) are obtained from L-lysine degradation, histamine (X150)  
426 from L-histidine degradation, and phenylpyruvic acid (X300) from L-phenylalanine  
427 degradation. The presumed role of these microorganisms in the degradation of cadaverine and  
428 L-histidine can be supported by previous studies. Roeder and Schink described a new strain  
429 close to *Clostridium aminobutyricum*, able to degrade cadaverine, in co-culture with the  
430 archaea *Methanospirillum* (Roeder and Schink, 2009). On the other hand, some *Clostridium*  
431 were also identified to be involved in the histamine degradation (Pugin et al., 2017).

432 In Group 5, heptane-1,2,3-triol and hexadecandiperoxoic acid were found to be  
433 descriptive of this cluster. The role of these molecules in this cluster is unknown and it must  
434 be further investigated. *Methanoculleus* and *Methanobacterium* were correlated to the genus  
435 *Syntrophomonas*. Some species of this bacterium are known to growth in syntrophy with H<sub>2</sub>-  
436 consumer as methanogens (Mcinerney et al., 1981).

437 In the different groups, there were some ROIs that could not be assigned. In MS  
438 metabolomics analysis, the step of *m/z* assignment is a traditional bottleneck (Longnecker et  
439 al., 2015). In this study, in addition, the assignment is even more hampered due to the higher  
440 structural diversity of the compounds found in digesters, the lack of specific databases, and  
441 the absence of precedent literature of metabolomics analysis on anaerobic digesters. Despite  
442 all these drawbacks, some correlations between microorganisms and metabolite degradations  
443 could still be pointed out. Therefore, if the limitations in the metabolite assignment can be  
444 addressed, a better insight of the correlations between microbial and metabolic data will be  
445 drawn. .

446 The statistical method developed in this study allows to posit hypotheses on the  
447 degradation of molecules by different microorganisms. These hypotheses were consistent in

448 regards with the literature. However, in order to go further in the interpretation,  
449 complementary analyses must be performed. Firstly, the molecules identification needs to be  
450 reinforced by using MS/MS fragmentation and by comparison of the acquired MS/MS spectra  
451 with the spectra of standards. Secondly, the ultimate proof of the degradation of the molecules  
452 by the identified microorganisms can be obtained by performing microbial cultures using  
453 these molecules as substrates, or by performing experiments with labelled molecules (stable  
454 isotope probing, (Chapleur et al., 2016)). Finally, a much broader metabolic coverage can be  
455 obtained by using different extraction protocols, by combining different instrumental  
456 implementations (i.e., by analysing the samples using different ionisation modes), by using  
457 different chromatographic columns (i.e., reverse phase and HILIC), and even by using  
458 different high-throughput metabolomics techniques (i.e, LC-MS, GC-MS, and NMR  
459 spectroscopy).

460

## 461 **Conclusion**

462 This study demonstrates the existence of links between the anaerobic digester feeding  
463 composition and the microbiota development. Our method allowed the extraction of the  
464 correlation patterns between the microorganisms' activity and the degradation of molecules,  
465 characteristic of each substrate. We identified a subset of active microorganisms highly  
466 correlated with molecules degradation patterns. The highlighted microbial and metabolic  
467 correlations were biologically relevant and consistent with previous literature. The  
468 development of new omics methodologies and associated databases focused on anaerobic  
469 digesters metabolic composition will open new approaches to study and improve the  
470 functioning mechanisms of these bioprocesses.

471

472 **Disclosures**

473 The authors declare no competing financial interest

474

475 **Funding**

476 This work was supported by the National Research Agency (grant number NR-16-CE05-  
477 0014) as part of the Digestomic project. Kim Anh Lê Cao, Olivier Chapleur and Laëtitia  
478 Cardona scientific travels were supported in part by the France-Australia Science Innovation  
479 Collaboration (FASIC) Program Early Career Fellowships from the Australian Academy of  
480 Science (grant number 39417TM). Kim Anh Lê Cao was supported in part by the National  
481 Health and Medical Research Council (NHMRC) Career Development fellowship (grant  
482 number GNT1159458).

483

484 **Acknowledgements**

485 We thank Nadine Derlet from the Irstea PROSE analytical division for their technical  
486 support. We acknowledge SUEZ Environment for providing us the access to the wastewater  
487 treatment plant of Valenton.

488

489 **References**

490 Amha, Y.M., Anwar, M.Z., Brower, A., Jacobsen, C.S., Stadler, L.B., Webster, T.M., Smith,  
491 A.L., 2018. Inhibition of anaerobic digestion processes: Applications of molecular tools.  
492 *Bioresour. Technol.* 247, 999–1014. <https://doi.org/10.1016/j.biortech.2017.08.210>  
493 Beale, D.J., Karpe, A. V., McLeod, J.D., Gondalia, S. V., Muster, T.H., Othman, M.Z.,  
494 Palombo, E.A., Joshi, D., 2016. An “omics” approach towards the characterisation of  
495 laboratory scale anaerobic digesters treating municipal sewage sludge. *Water Res.*  
496 <https://doi.org/10.1016/j.watres.2015.10.029>  
497 Bize, A., Cardona, L., Desmond-Le Quéméner, E., Battimelli, A., Badalato, N., Bureau, C.,  
498 Madigou, C., Chevret, D., Guillot, A., Monnet, V., Godon, J.J., Bouchez, T., 2015.  
499 Shotgun metaproteomic profiling of biomimetic anaerobic digestion processes treating



500 sewage sludge. *Proteomics* 15, 3532–3543. <https://doi.org/10.1002/pmic.201500041>

501 Bouhleb, J., Jouan-Rimbaud Bouveresse, D., Abouelkaram, S., Baéza, E., Jondreville, C.,  
502 Travel, A., Ratel, J., Engel, E., Rutledge, D.N., 2018. Comparison of common  
503 components analysis with principal components analysis and independent components  
504 analysis: Application to SPME-GC-MS volatolomic signatures. *Talanta* 178, 854–863.  
505 <https://doi.org/10.1016/j.talanta.2017.10.025>

506 Cai, M., Wilkins, D., Chen, J., Ng, S.K., Lu, H., Jia, Y., Lee, P.K.H., 2016. Metagenomic  
507 reconstruction of key anaerobic digestion pathways in municipal sludge and industrial  
508 wastewater biogas-producing systems. *Front. Microbiol.* 7.  
509 <https://doi.org/10.3389/fmicb.2016.00778>

510 Callahan, B.J., Sankaran, K., Fukuyama, J.A., McMurdie, P.J., Holmes, S.P., 2016.  
511 Bioconductor Workflow for Microbiome Data Analysis: from raw reads to community  
512 analyses. *F1000Research* 5, 1492. <https://doi.org/10.12688/f1000research.8986.2>

513 Cardona, L., Levrard, C., Guenne, A., Chapleur, O., Mazéas, L., 2019. Co-digestion of  
514 wastewater sludge: choosing the optimal blend. *Chem. Eng. J.* 87, 772–781.  
515 <https://doi.org/10.1016/j.wasman.2019.03.016>

516 Chapleur, O., Mazeas, L., Godon, J.J., Bouchez, T., 2016. Asymmetrical response of  
517 anaerobic digestion microbiota to temperature changes. *Appl. Microbiol. Biotechnol.*  
518 100, 1445–1457. <https://doi.org/10.1007/s00253-015-7046-7>

519 De Francisci, D., Kougiyas, P.G., Treu, L., Campanaro, S., Angelidaki, I., 2015. Microbial  
520 diversity and dynamicity of biogas reactors due to radical changes of feedstock  
521 composition. *Bioresour. Technol.* <https://doi.org/10.1016/j.biortech.2014.10.126>

522 De Vrieze, J., Pinto, A.J., Sloan, W.T., Boon, N., Ijaz, U.Z., 2018. The active microbial  
523 community more accurately reflects the anaerobic digestion process : 16S rRNA ( gene )  
524 sequencing as a predictive tool. *Microbiome* 1–13.  
525 <https://doi.org/doi.org/10.1186/s40168-018-0449-9>

526 Escudié, F., Auer, L., Bernard, M., Mariadassou, M., Cauquil, L., Vidal, K., Maman, S.,  
527 Hernandez-Raquet, G., Combes, S., Pascal, G., 2018. FROGS: Find, Rapidly, OTUs  
528 with Galaxy Solution. *Bioinformatics* 34, 1287–1294.

529 Fahy, E., Sud, M., Cotter, D., Subramaniam, S., 2007. LIPID MAPS online tools for lipid  
530 research. *Nucleic Acids Res.* 35, 606–612. <https://doi.org/10.1093/nar/gkm324>

531 Fessard, A., Remize, F., 2017. Why Are *Weissella* spp. Not Used as Commercial Starter  
532 Cultures for Food Fermentation? *Fermentation* 3, 38.  
533 <https://doi.org/10.3390/fermentation3030038>



- 534 Filannino, P., Gobbetti, M., Angelis, M. De, Cagno, R. Di, 2014. Hydroxycinnamic Acids  
535 Used as External Acceptors of Electrons: an Energetic Advantage for Strictly  
536 Heterofermentative Lactic Acid Bacteria 80, 7574–7582.  
537 <https://doi.org/10.1128/AEM.02413-14>
- 538 Hassa, J., Maus, I., Off, S., Pühler, A., Scherer, P., Klocke, M., Schlüter, A., 2018.  
539 Metagenome, metatranscriptome, and metaproteome approaches unraveled compositions  
540 and functional relationships of microbial communities residing in biogas plants. *Appl.*  
541 *Microbiol. Biotechnol.* 102, 5045–5063. <https://doi.org/10.1007/s00253-018-8976-7>
- 542 Horai, H., Arita, M., Kanaya, S., Nihei, Y., Ikeda, T., Suwa, K., Ojima, Y., Tanaka, K.,  
543 Tanaka, S., Aoshima, K., Oda, Y., Kakazu, Y., Kusano, M., Tohge, T., Matsuda, F.,  
544 Sawada, Y., Hirai, M.Y., Nakanishi, H., Ikeda, K., Akimoto, N., Maoka, T., Takahashi,  
545 H., Ara, T., Sakurai, N., Suzuki, H., Shibata, D., Neumann, S., Iida, T., Tanaka, K.,  
546 Funatsu, K., Matsuura, F., Soga, T., Taguchi, R., Saito, K., Nishioka, T., 2010.  
547 MassBank: A public repository for sharing mass spectral data for life sciences. *J. Mass*  
548 *Spectrom.* 45, 703–714. <https://doi.org/10.1002/jms.1777>
- 549 Ito, T., Yoshiguchi, K., Ariesyady, H.D., Okabe, S., 2011. Identification of a novel acetate-  
550 utilizing bacterium belonging to Synergistes group 4 in anaerobic digester sludge. *ISME*  
551 *J.* 5, 1844–1856. <https://doi.org/10.1038/ismej.2011.59>
- 552 Lê Cao, K.-A., Boitard, S., Besse, P., 2011. Sparse PLS discriminant analysis: biologically  
553 relevant feature selection and graphical displays for multiclass problems. *BMC*  
554 *Bioinformatics* 12, 253. <https://doi.org/10.1186/1471-2105-12-253>
- 555 Lê Cao, K.-A., Martin, P.G., Robert-Granié, C., Besse, P., 2009. Sparse canonical methods  
556 for biological data integration: application to a cross-platform study. *BMC*  
557 *Bioinformatics* 10, 34. <https://doi.org/10.1186/1471-2105-10-34>
- 558 Lee, J., Kim, E., Han, G., Tongco, J.V., Shin, S.G., Hwang, S., 2018. Microbial communities  
559 underpinning mesophilic anaerobic digesters treating food wastewater or sewage sludge:  
560 A full-scale study. *Bioresour. Technol.* 259, 388–397.  
561 <https://doi.org/10.1016/j.biortech.2018.03.052>
- 562 Li, N., He, J., Yan, H., Chen, S., Dai, X., 2017. Pathways in bacterial and archaeal  
563 communities dictated by ammonium stress in a high solid anaerobic digester with  
564 dewatered sludge. *Bioresour. Technol.* 241, 95–102.  
565 <https://doi.org/10.1016/j.biortech.2017.05.094>
- 566 Lin, Q., De Vrieze, J., Li, J., Li, X., 2016. Temperature affects microbial abundance, activity  
567 and interactions in anaerobic digestion. *Bioresour. Technol.* 209, 228–236.

- 568 <https://doi.org/10.1016/j.biortech.2016.02.132>
- 569 Longnecker, K., Futrelle, J., Coburn, E., Kido, M.C., Kujawinski, E.B., 2015. Environmental  
570 metabolomics: Databases and tools for data analysis. *Mar. Chem.* 177, 366–373.  
571 <https://doi.org/10.1016/j.marchem.2015.06.012>
- 572 Madigou, C., Lê Cao, K.-A., Bureau, C., Mazéas, L., Déjean, S., Chapleur, O., 2019.  
573 Ecological consequences of abrupt temperature changes in anaerobic digesters. *Chem.*  
574 *Eng. J.* 361, 266–277. <https://doi.org/10.1016/J.CEJ.2018.12.003>
- 575 Mcinerney, M.J., Bryant, M.P., Hespell, R.B., Costerton, J.W., 1981. *Syntrophomonas wolfei*  
576 *gen. nov. sp. nov.*, an Anaerobic, Syntrophic, Fatty Acid-Oxidizing Bacterium 41, 1029–  
577 1039.
- 578 Noll, M., Klose, M., Conrad, R., 2010. Effect of temperature change on the composition of  
579 the bacterial and archaeal community potentially involved in the turnover of acetate and  
580 propionate in methanogenic rice field soil. *FEMS Microbiol. Ecol.* 73, 215–25.  
581 <https://doi.org/10.1111/j.1574-6941.2010.00883.x>
- 582 Nomura, H., Ueyama, J., Sugiura, Y., Takaishi, A., Hayashi, Y., Kondo, T., Inuzuka, K.,  
583 Kamijima, M., Ogi, H., Osaka, A., Inoue, M., Wakusawa, S., Saito, I., 2014. A revised  
584 method for determination of dialkylphosphate levels in human urine by solid-phase  
585 extraction and liquid chromatography with tandem mass spectrometry: application to  
586 human urine samples from Japanese children. *Environ. Health Prev. Med.* 19, 405–413.  
587 <https://doi.org/10.1007/s12199-014-0407-5>
- 588 Poirier, S., Bize, A., Bureau, C., Bouchez, T., Chapleur, O., 2016. Community shifts within  
589 anaerobic digestion microbiota facing phenol inhibition: Towards early warning  
590 microbial indicators? *Water Res.* 100, 296–305.  
591 <https://doi.org/10.1016/j.watres.2016.05.041>
- 592 Pugin, B., O'Mahony, L., Westermann, P., Hellings, P., Wawrzyniak, M., Heider, A., Akdis,  
593 C.A., Barcik, W., 2017. A wide diversity of bacteria from the human gut produces and  
594 degrades biogenic amines. *Microb. Ecol. Health Dis.* 28, 1353881.  
595 <https://doi.org/10.1080/16512235.2017.1353881>
- 596 Roeder, J., Schink, B., 2009. Syntrophic degradation of cadaverine by a defined methanogenic  
597 coculture. *Appl. Environ. Microbiol.* 75, 4821–4828.  
598 <https://doi.org/10.1128/AEM.00342-09>
- 599 Rohart, F., Gautier, B., Singh, A., Cao, K.-A. Le, 2017. mixOmics: an R package for 'omics  
600 feature selection and multiple data integration. *bioRxiv* 108597.  
601 <https://doi.org/10.1101/108597>

- 602 Sekiguchi, Y., Takahashi, H., Kamagata, Y., Ohashi, A., Harada, H., 2001. In Situ Detection,  
603 Isolation, and Physiological Properties of a Thin Filamentous Microorganism Abundant  
604 in Methanogenic Granular Sludges: a Novel Isolate Affiliated with a Clone Cluster, the  
605 Green Non-Sulfur Bacteria, Subdivision I. *Appl. Environ. Microbiol.* 67, 5740–5749.  
606 <https://doi.org/10.1128/AEM.67.12.5740>
- 607 Shen, H., Huang, J.Z., 2008. Sparse principal component analysis via regularized low rank  
608 matrix approximation. *J. Multivar. Anal.* 99, 1015–1034.  
609 <https://doi.org/10.1016/j.jmva.2007.06.007>
- 610 Singh, A., Benoît, G., Shannon, C.P., Vacher, M., Rohart, F., Tebbutt, S.J., Lê Cao, K.-A.,  
611 2019. DIABLO: an integrative, multi-omics, multivariate method for multi-group  
612 classification. *Bioinformatics* 1–50.  
613 <https://doi.org/https://doi.org/10.1093/bioinformatics/bty1054>
- 614 Smith, C.A., Want, E.J., Maille, G.O., Abagyan, R., Siuzdak, G., 2006. XCMS : Processing  
615 Mass Spectrometry Data for Metabolite Profiling Using Nonlinear Peak Alignment ,  
616 Matching , and Identification. *Anal. chemistry* 78, 779–787.
- 617 Sousa, D.Z., Salvador, A.F., Ramos, J., Guedes, A.P., Barbosa, S., Stams, A.J.M., Alves,  
618 M.M., Pereira, M.A., 2013. Activity and viability of methanogens in anaerobic digestion  
619 of unsaturated and saturated long-chain fatty acids. *Appl. Environ. Microbiol.* 79, 4239–  
620 4245. <https://doi.org/10.1128/AEM.00035-13>
- 621 Swiatczak, P., Cydzik-Kwiatkowska, A., Rusanowska, P., 2017. Microbiota of anaerobic  
622 digesters in a full-scale wastewater treatment plant. *Arch. Environ. Prot.* 43, 53–60.  
623 <https://doi.org/10.1515/aep-2017-0033>
- 624 Vanwonterghem, I., Jensen, P.D., Ho, D.P., Batstone, D.J., Tyson, G.W., 2014. Linking  
625 microbial community structure, interactions and function in anaerobic digesters using  
626 new molecular techniques. *Curr. Opin. Biotechnol.* 27, 55–64.  
627 <https://doi.org/10.1016/j.copbio.2013.11.004>
- 628 Villas-Bôas, S.G., Noel, S., Lane, G.A., Attwood, G., Cookson, A., 2006. Extracellular  
629 metabolomics: A metabolic footprinting approach to assess fiber degradation in complex  
630 media. *Anal. Biochem.* 349, 297–305. <https://doi.org/10.1016/j.ab.2005.11.019>
- 631 Wishart, D.S., Feunang, Y.D., Marcu, A., Guo, A.C., Liang, K., Vázquez-Fresno, R., Sajed,  
632 T., Johnson, D., Li, C., Karu, N., Sayeeda, Z., Lo, E., Assempour, N., Berjanskii, M.,  
633 Singhal, S., Arndt, D., Liang, Y., Badran, H., Grant, J., Serra-Cayuela, A., Liu, Y.,  
634 Mandal, R., Neveu, V., Pon, A., Knox, C., Wilson, M., Manach, C., Scalbert, A., 2018.  
635 HMDB 4.0: The human metabolome database for 2018. *Nucleic Acids Res.* 46, D608–

636 D617. <https://doi.org/10.1093/nar/gkx1089>  
637 Zamanzadeh, M., Hagen, L.H., Svensson, K., Linjordet, R., Horn, S.J., 2017. Biogas  
638 production from food waste via co-digestion and digestion- effects on performance and  
639 microbial ecology. *Sci. Rep.* 7, 1–12. <https://doi.org/10.1038/s41598-017-15784-w>  
640  
641
